# Supplementary material
Source: PubMed Central journal article supplement (PMC3389145)
Supplement: NIHMS380576-supplement-1_si_001.pdf [file NIHMS380576-supplement-1_si_001.pdf]

## Supporting Information for

### A Mass Spectrometry Sensor for *in vivo* Acetylcholine Monitoring

Peng Song<sup>a</sup>, Neil Hershey<sup>a</sup>, Omar Mabrouk<sup>a,b</sup>, Tom Slaney<sup>a</sup>, and Robert Kennedy<sup>a,b,\*</sup>

|                  |                                                                                  |
|------------------|----------------------------------------------------------------------------------|
| <b>Figure S1</b> | Ion suppression of acetylcholine by salt in aCSF.                                |
| <b>Figure S2</b> | Carryover at the ESI probe                                                       |
| <b>Figure S3</b> | Acetylcholine trace in the first 30 min of neostigmine microinjection experiment |

**Figure S1**

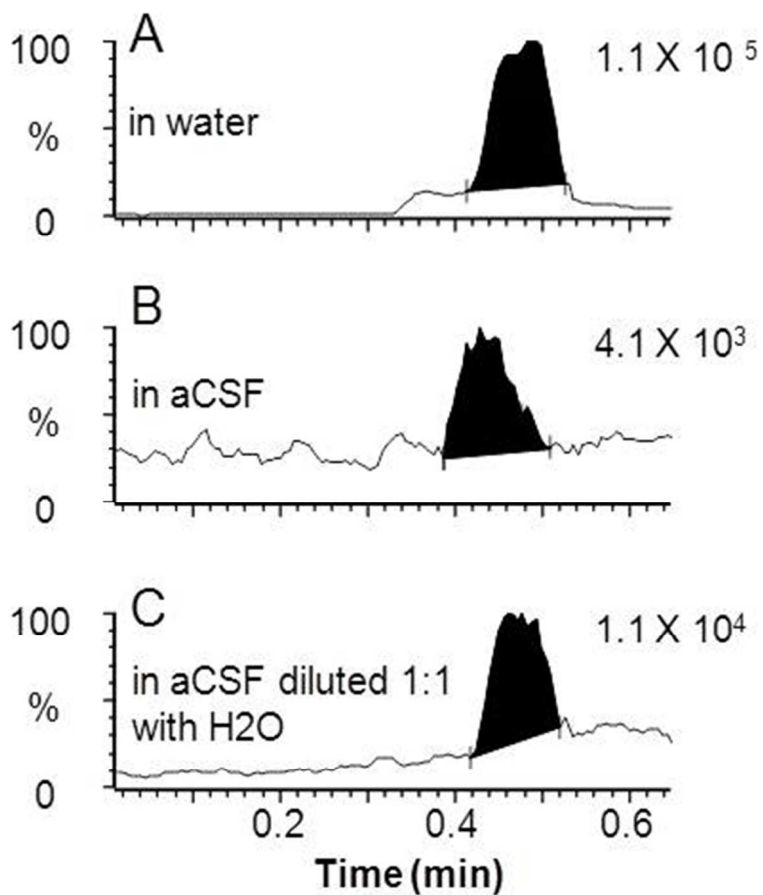

**Figure S1** Ion suppression of d4-acetylcholine by the inorganic salt in aCSF shown by FIA coupled to ESI-MS/MS (150→91). 50 nM d4-acetylcholine was dissolved in water (A), aCSF (B) and diluted aCSF (C). Ion intensity was shown on the top right corner. FIA flow rate was 100  $\mu$ L/min. Acquisition started right after sample injection.

Figure S2

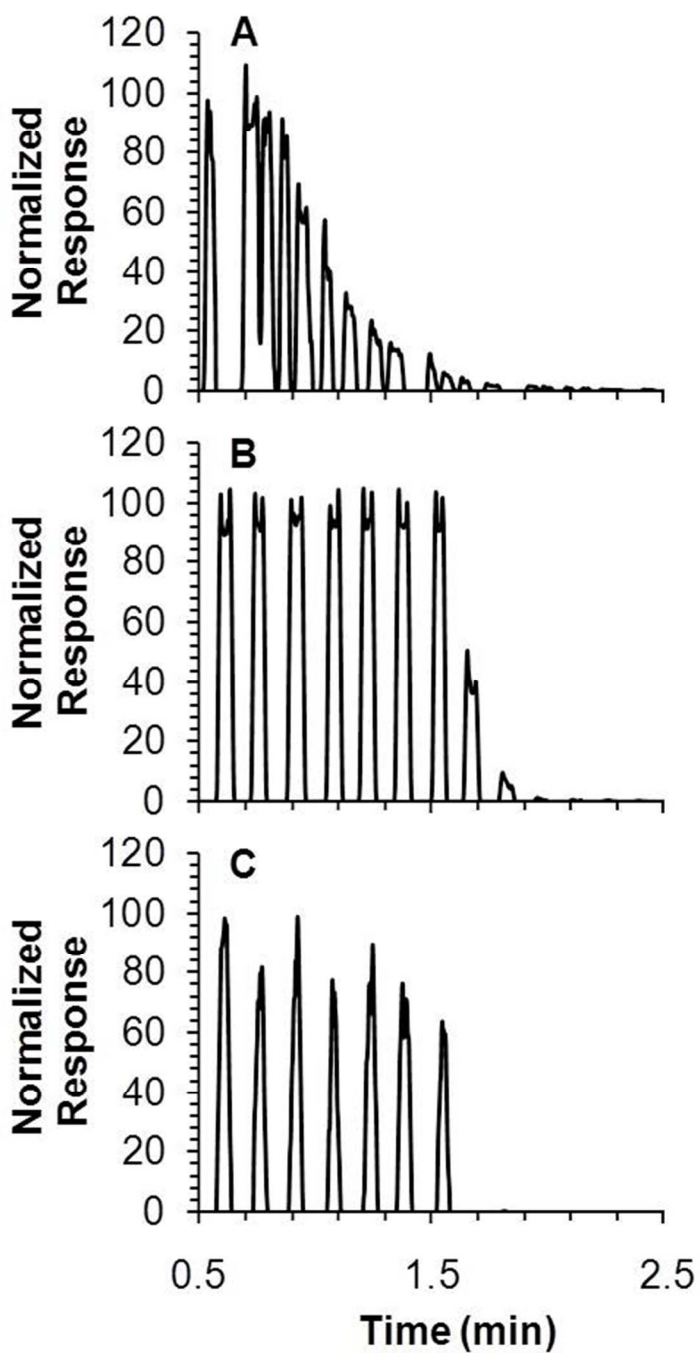

**Figure S2** Carryover at the ESI probe liquid connection characterized by infusing discrete droplets containing 1  $\mu\text{M}$  acetylcholine and then step decrease to 0  $\mu\text{M}$  using: (A) a low dead volume union and steel ESI needle; (B) a zero dead volume union and steel ESI probe; and (C) a zero dead volume union and modified fused silica ESI needle.

**Figure S3**

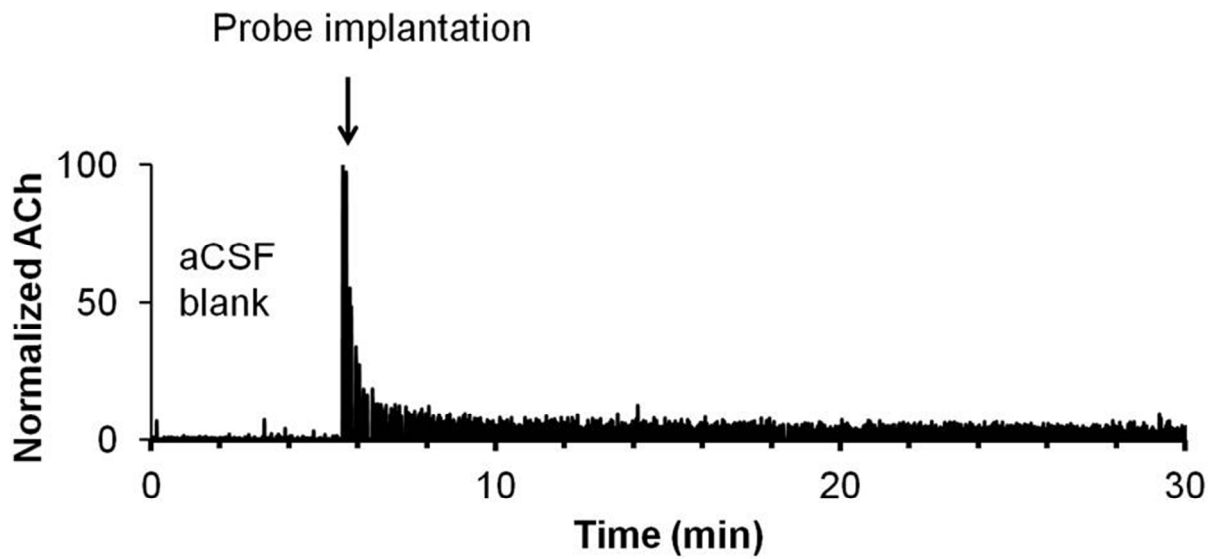

**Figure S3** Acetylcholine traces during initial 25 min of dialysis probe insertion. Microdialysis probe was kept in blank aCSF before implantation (0-6 min). The spike of acetylcholine at 6 min was caused by tissue damage as the probe was inserted into the brain. Within a few min a stable signal was achieved.
